# Supplementary material for: β-Adrenergic Stimulation Synchronizes a Broad Spectrum of Action Potential Firing Rates of Cardiac Pacemaker Cells toward a Higher Population Average
Source: MDPI journal article supplement (doi:10.3390/cells10082124), 2021-08-18
Supplement: s1 [file s1]

| Parameter                                 | All cells  |          | Cells/animal ≤7 |          | Cells/animal ≥8 |          |
|-------------------------------------------|------------|----------|-----------------|----------|-----------------|----------|
| Number of cells                           | 166        |          | 82              |          | 84              |          |
| Conditions                                | Basal      | ISO      | Basal           | ISO      | Basal           | ISO      |
| Mean value                                | 921.7614   | 507.3039 | 923.1902        | 514.636  | 920.3667        | 500.1464 |
| SEM                                       | 66.47293   | 13.12734 | 71.66966        | 17.89898 | 111.6491        | 19.24943 |
| SD                                        | 856.4438   | 169.134  | 648.9964        | 162.0821 | 1023.281        | 176.4239 |
| CV%                                       | 92.91382   | 33.33977 | 70.29931        | 31.49452 | 111.1819        | 35.27445 |
| Cells with unusual response (CL increase) | 38 (22.9%) |          | 17 (20.7%)      |          | 21(25%)         |          |
| Regression slope                          | -0.962     |          | -0.8913         |          | 0.9897          |          |
| Regression offset                         | 472.26     |          | 414.28          |          | 490.71          |          |
| R <sup>2</sup>                            | 0.961      |          | 0.9402          |          | 0.9707          |          |

**Table S1.** Statistical data and results of linear regression analyses of AP cycle lengths (given in ms) measured in two subgroups of cells with different numbers of cells/animal compared to the results obtained in all cells. CL, cycle length of AP-induced Ca transient; ISO, isoproterenol; SD, standard deviation; SEM, standard error of mean; CV coefficient of variation (in %) = 100\*Mean/SD.
